# Supplementary material
Source: PubMed Central journal article supplement (PMC1500973)
Supplement: 7601179s1.pdf [file 7601179s1.pdf]

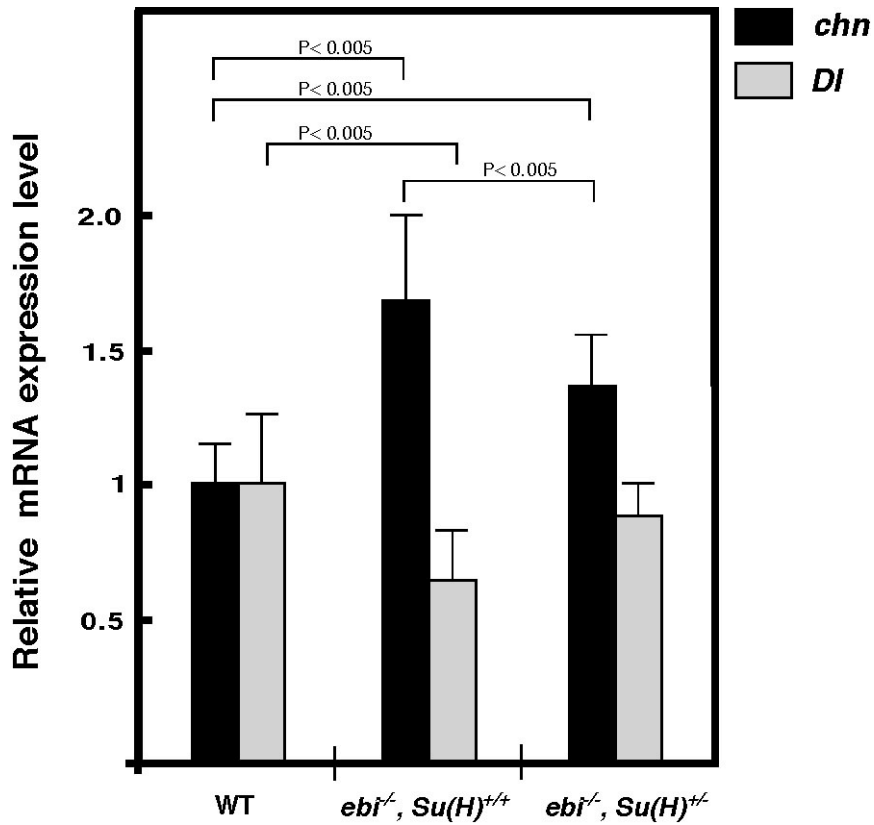

Relative expression level of *chn* and *Dl*. The levels of *elav*, *chn* and *Dl* mRNAs derived from eye-antennal discs in the different genetic background were measured by quantitative RT-PCR. The data were normalized by *elav* mRNA.

*ebi*<sup>-/-</sup>/*ebi*<sup>-/-</sup>; *Su(H)*<sup>+/+</sup>: *ebi*<sup>P7</sup>/*ebi*<sup>E4</sup>

*ebi*<sup>-/-</sup>/*ebi*<sup>-/-</sup>; *Su(H)*<sup>+/-</sup>: *ebi*<sup>P7</sup> *Su(H)*<sup>2</sup>/*ebi*<sup>E4</sup>, +.

**Supplemental Figure 1, Tsuda et al.**
