# Supplementary material
Source: PubMed Central journal article supplement (PMC1500973)
Supplement: 7601179s2.pdf [file 7601179s2.pdf]

## Supplemental materials and methods

### Oligonucleotides

The following oligonucleotides were used for EMSA.

E(spl)my

5'-GGGGGGGGCAAACACCGAGTGTGGGAACTACAAGGATA-3'

3'-GTTTTGTGGCTCACACCCTTTGATGTTCCCTAT-5'

E(spl)my-mut

5'-GGGGGGGGCAAACACCGAGTGTGTTTAACTACAAGGATA-3'

3'-GTTTTGTGGCTCACACAAATTGATGTTCCCTAT-5'

S1

5'-GGGGGGGGTCCATCTCAGTCTGTTGGAATTTCTCGTGGTG-3'

3'-AGGTAGAGTCAGACAACCTTAAAGAGCACCAC-5'

S1-mut

5'-GGGGGGGGTCCATCTCAGTCTGTTTTTATTTCTCGTGGTG-3'

3'-AGGTAGAGTCAGACAAAATAAAGAGCACCAC-5'

S2

5'-GGGGGGGGGTGCGGCATTATTATAAGAATCATTACAACGC-3'

3'-CACGCCGTAATAATATTCTTAGTAATGTTGCG

S2-mut

5'-GGGGGGGGGTGCGGCATTATTATATTTATCATTACAACGC-3'

3'-CACGCCGTAATAATATAAATAGTAATGTTGCG-5'

NRSE

5'-GGGGGGGGTGAGTTTCAGCACCCACGGACAGCGCCCATTT-3'

3'-ACTCAAAGTCGTGGTGCCTGTTCGCGGGTAAA-5'

NRSE-mut

5'-GGGGGGGGTGAGTTTCAGCACCCACGGAAAGCGACCATTT-3'

3'-ACTCAAAGTCGTGGTGCCTTTCGCTGGTAAA-5'

DI-CBE1

5'-GGGGGGGGCCATATTCAGCACCCACCGCCATTGGTGCGAT-3'

3'-ATCGCACCAATGGCGGTGGTGCTGAATATGG-5'

DI-CBE1-mut

5'-GGGGGGGGCCATATTCAGCACCCACCGAAATTGGTGCGAT-3'

3'-ATCGCACCAATTCGGTGGTGCTGAATATGG-5'

The following primers were used in the ChIP analysis:

PR(chn)

5'-GGATAACGAATCCACCGCAC-3'

5'-CAGTTGGCCCTATGGCCATT-3'

Int(chn)

5'-CCCGGCATCTGCGAAAATGC-3'

5'-GTGGCTGTGGCTGTTTCTGC-3'

hsp27

5'-AAAGAACGGCAAACATGAGG-3'

5'-CTTCTGGCTCTTTCTAGCACAG-3'

E(spl)mδ

5'-TCCAGTGCACCTGCACGCATA-3'

5'-TTCGGATCTTCGCCCCGAGCTA-3'

MS

5'-CCGTAAGCCCATAAGCGTAA-3'

5'-GGCTACGGCTAGAGTTCGTG-3'

DI-CBE1

5'-CTGATGCCGCATTCATTT

5'-GAAGAATGGATTTCGGAG

DI-CBE2

5'-TTGCTCGCTCGCAGTTGGCT

5'-GGATCCTTCTGAGCCGGTCA
